# Supplementary material
Source: publisher figshare collection journal article supplement (https://acs.figshare.com/ndownloader/files/5834457)
Supplement: Supplementary file 1 [file 5834457]

# CIF FILES FOR M/S OL0258233

_publ_contact_author             'Ian Duncan Williams'
_publ_contact_author_email       ianduncanw@yahoo.com.hk

loop_
  _publ_author_name               Wei-Min Dai, Ian D. Williams et al'


_journal_name_full               'Organic Letters'


data_dai12

_audit_creation_method            SHELXL-97
_chemical_name_systematic
;
  ?
;
_chemical_name_common             ?
_chemical_melting_point           ?
_chemical_formula_moiety          ?
_chemical_formula_sum
  'C30 H32 N O2 P'
_chemical_formula_weight          469.54

loop_
  _atom_type_symbol
  _atom_type_description
  _atom_type_scat_dispersion_real
  _atom_type_scat_dispersion_imag
  _atom_type_scat_source
  'C'  'C'   0.0033   0.0016
  'International Tables Vol C Tables 4.2.6.8 and 6.1.1.4'
  'H'  'H'   0.0000   0.0000
  'International Tables Vol C Tables 4.2.6.8 and 6.1.1.4'
  'N'  'N'   0.0061   0.0033
  'International Tables Vol C Tables 4.2.6.8 and 6.1.1.4'
  'O'  'O'   0.0106   0.0060
  'International Tables Vol C Tables 4.2.6.8 and 6.1.1.4'
  'P'  'P'   0.1023   0.0942
  'International Tables Vol C Tables 4.2.6.8 and 6.1.1.4'

_symmetry_cell_setting            Monoclinic
_symmetry_space_group_name_H-M    P2(1)

loop_
  _symmetry_equiv_pos_as_xyz
  'x, y, z'
  '-x, y+1/2, -z'

_cell_length_a                    7.5807(10)
_cell_length_b                    15.193(2)
_cell_length_c                    11.4579(14)
_cell_angle_alpha                 90.00
_cell_angle_beta                  95.296(3)
_cell_angle_gamma                 90.00
_cell_volume                      1314.0(3)
_cell_formula_units_Z             2
_cell_measurement_temperature     293(2)
_cell_measurement_reflns_used     1414
_cell_measurement_theta_min       2.68
_cell_measurement_theta_max       22.20

_exptl_crystal_description        Block
_exptl_crystal_colour             Colourless
_exptl_crystal_size_max           0.3
_exptl_crystal_size_mid           0.3
_exptl_crystal_size_min           0.2
_exptl_crystal_density_meas       0
_exptl_crystal_density_diffrn     1.187
_exptl_crystal_density_method     'not measured'
_exptl_crystal_F_000              500
_exptl_absorpt_coefficient_mu     0.131
_exptl_absorpt_correction_type    Empirical
_exptl_absorpt_correction_T_min   ?
_exptl_absorpt_correction_T_max   ?
_exptl_absorpt_process_details    SADABS v 2.03

_exptl_special_details
;
Ratio of minimum to maximum apparent transmission:  0.839766
;

_diffrn_ambient_temperature       293(2)
_diffrn_radiation_wavelength      0.71073
_diffrn_radiation_type            MoK\a
_diffrn_radiation_source          'fine-focus sealed tube'
_diffrn_radiation_monochromator   graphite
_diffrn_measurement_device_type   'Bruker APEX CCD area detector'
_diffrn_measurement_method        'phi and omega scans'
_diffrn_detector_area_resol_mean  ?
_diffrn_standards_number          ?
_diffrn_standards_interval_count  ?
_diffrn_standards_interval_time   ?
_diffrn_standards_decay_%         ?
_diffrn_reflns_number             7871
_diffrn_reflns_av_R_equivalents   0.0237
_diffrn_reflns_av_sigmaI/netI     0.0629
_diffrn_reflns_limit_h_min        -9
_diffrn_reflns_limit_h_max        9
_diffrn_reflns_limit_k_min        -19
_diffrn_reflns_limit_k_max        19
_diffrn_reflns_limit_l_min        -8
_diffrn_reflns_limit_l_max        14
_diffrn_reflns_theta_min          1.78
_diffrn_reflns_theta_max          27.54
_reflns_number_total              5581
_reflns_number_gt                 4070
_reflns_threshold_expression      >2sigma(I)

_computing_data_collection        'Bruker SMART'
_computing_cell_refinement        'Bruker SMART'
_computing_data_reduction         'Bruker SAINT'
_computing_structure_solution     'SHELXS-97 (Sheldrick, 1990)'
_computing_structure_refinement   'SHELXL-97 (Sheldrick, 1997)'
_computing_molecular_graphics     'Bruker SHELXTL'
_computing_publication_material   'Bruker SHELXTL'

_refine_special_details
;
  Refinement of F^2^ against ALL reflections.  The weighted R-factor wR and
  goodness of fit S are based on F^2^, conventional R-factors R are based
  on F, with F set to zero for negative F^2^. The threshold expression of
  F^2^ > 2sigma(F^2^) is used only for calculating R-factors(gt) etc. and is
  not relevant to the choice of reflections for refinement.  R-factors based
  on F^2^ are statistically about twice as large as those based on F, and R-
  factors based on ALL data will be even larger.
;

_refine_ls_structure_factor_coef  Fsqd
_refine_ls_matrix_type            full
_refine_ls_weighting_scheme       calc
_refine_ls_weighting_details
  'calc w=1/[\s^2^(Fo^2^)+(0.0350P)^2^+0.0000P] where P=(Fo^2^+2Fc^2^)/3'
_atom_sites_solution_primary      direct
_atom_sites_solution_secondary    difmap
_atom_sites_solution_hydrogens    geom
_refine_ls_hydrogen_treatment     mixed
_refine_ls_extinction_method      none
_refine_ls_extinction_coef        ?
_refine_ls_abs_structure_details
  'Flack H D (1983), Acta Cryst. A39, 876-881'
_refine_ls_abs_structure_Flack    -0.01(9)
_refine_ls_number_reflns          5581
_refine_ls_number_parameters      307
_refine_ls_number_restraints      1
_refine_ls_R_factor_all           0.0775
_refine_ls_R_factor_gt            0.0491
_refine_ls_wR_factor_ref          0.0955
_refine_ls_wR_factor_gt           0.0855
_refine_ls_goodness_of_fit_ref    1.007
_refine_ls_restrained_S_all       1.007
_refine_ls_shift/su_max           0.000
_refine_ls_shift/su_mean          0.000

loop_
  _atom_site_label
  _atom_site_type_symbol
  _atom_site_fract_x
  _atom_site_fract_y
  _atom_site_fract_z
  _atom_site_U_iso_or_equiv
  _atom_site_adp_type
  _atom_site_occupancy
  _atom_site_symmetry_multiplicity
  _atom_site_calc_flag
  _atom_site_refinement_flags
  _atom_site_disorder_assembly
  _atom_site_disorder_group
P1 P 0.78586(8) 0.32278(5) 0.78531(5) 0.04045(17) Uani 1 1 d . . .
O1 O 0.6793(2) 0.46331(11) 0.57764(15) 0.0469(5) Uani 1 1 d . . .
O2 O 0.6574(3) 0.40298(12) 0.32964(15) 0.0597(6) Uani 1 1 d . . .
N1 N 0.9459(2) 0.41441(12) 0.52995(16) 0.0357(5) Uani 1 1 d . . .
C1 C 0.7019(3) 0.31050(16) 0.54529(18) 0.0326(5) Uani 1 1 d . . .
C2 C 0.6248(3) 0.27240(16) 0.4380(2) 0.0361(6) Uani 1 1 d . . .
C3 C 0.6048(3) 0.3170(2) 0.3282(2) 0.0415(6) Uani 1 1 d . . .
C4 C 0.5322(4) 0.27595(19) 0.2292(2) 0.0521(7) Uani 1 1 d . . .
H4A H 0.5204 0.3063 0.1585 0.063 Uiso 1 1 calc R . .
C5 C 0.4759(4) 0.1892(2) 0.2334(3) 0.0594(8) Uani 1 1 d . . .
H5A H 0.4282 0.1618 0.1650 0.071 Uiso 1 1 calc R . .
C6 C 0.4891(4) 0.14385(19) 0.3352(2) 0.0524(7) Uani 1 1 d . . .
H6A H 0.4511 0.0857 0.3365 0.063 Uiso 1 1 calc R . .
C7 C 0.5608(3) 0.18466(16) 0.4400(2) 0.0391(6) Uani 1 1 d . . .
C8 C 0.5678(3) 0.13971(17) 0.5479(2) 0.0444(6) Uani 1 1 d . . .
H8A H 0.5290 0.0817 0.5492 0.053 Uiso 1 1 calc R . .
C9 C 0.6292(3) 0.17868(16) 0.6492(2) 0.0434(6) Uani 1 1 d . . .
H9A H 0.6258 0.1485 0.7195 0.052 Uiso 1 1 calc R . .
C10 C 0.6996(3) 0.26591(16) 0.6498(2) 0.0371(6) Uani 1 1 d . . .
C11 C 0.7754(3) 0.40320(16) 0.55037(19) 0.0348(6) Uani 1 1 d . . .
C12 C 0.6022(5) 0.4567(2) 0.2336(3) 0.0784(10) Uani 1 1 d . . .
H12A H 0.6492 0.5149 0.2468 0.118 Uiso 1 1 calc R . .
H12B H 0.4752 0.4592 0.2245 0.118 Uiso 1 1 calc R . .
H12C H 0.6446 0.4326 0.1639 0.118 Uiso 1 1 calc R . .
C13 C 1.0599(3) 0.34100(17) 0.4991(2) 0.0509(7) Uani 1 1 d . . .
H13A H 0.9872 0.2876 0.4967 0.061 Uiso 1 1 calc R . .
C14 C 1.1219(5) 0.3525(3) 0.3782(3) 0.0847(11) Uani 1 1 d . . .
H14A H 1.0211 0.3605 0.3220 0.127 Uiso 1 1 calc R . .
H14B H 1.1863 0.3011 0.3581 0.127 Uiso 1 1 calc R . .
H14C H 1.1975 0.4031 0.3777 0.127 Uiso 1 1 calc R . .
C15 C 1.2133(3) 0.3265(3) 0.5923(3) 0.0794(9) Uani 1 1 d . . .
H15A H 1.1682 0.3186 0.6672 0.119 Uiso 1 1 calc R . .
H15B H 1.2903 0.3768 0.5953 0.119 Uiso 1 1 calc R . .
H15C H 1.2783 0.2751 0.5733 0.119 Uiso 1 1 calc R . .
C16 C 1.0274(3) 0.50274(17) 0.5409(2) 0.0470(7) Uani 1 1 d . . .
H16A H 1.1510 0.4956 0.5240 0.056 Uiso 1 1 calc R . .
C17 C 1.0326(4) 0.5396(2) 0.6640(3) 0.0707(9) Uani 1 1 d . . .
H17A H 1.0872 0.4976 0.7186 0.106 Uiso 1 1 calc R . .
H17B H 0.9141 0.5513 0.6828 0.106 Uiso 1 1 calc R . .
H17C H 1.0999 0.5932 0.6687 0.106 Uiso 1 1 calc R . .
C18 C 0.9430(4) 0.5661(2) 0.4494(3) 0.0689(9) Uani 1 1 d . . .
H18A H 0.9432 0.5402 0.3730 0.103 Uiso 1 1 calc R . .
H18B H 1.0093 0.6200 0.4520 0.103 Uiso 1 1 calc R . .
H18C H 0.8233 0.5781 0.4654 0.103 Uiso 1 1 calc R . .
C21 C 0.5807(3) 0.35176(17) 0.8496(2) 0.0420(6) Uani 1 1 d . . .
C22 C 0.5443(4) 0.4400(2) 0.8628(2) 0.0609(8) Uani 1 1 d . . .
H22A H 0.6222 0.4819 0.8380 0.073 Uiso 1 1 calc R . .
C23 C 0.3937(5) 0.4673(3) 0.9122(3) 0.0794(10) Uani 1 1 d . . .
H23A H 0.3705 0.5270 0.9198 0.095 Uiso 1 1 calc R . .
C24 C 0.2790(4) 0.4062(3) 0.9498(3) 0.0743(10) Uani 1 1 d . . .
H24A H 0.1785 0.4245 0.9838 0.089 Uiso 1 1 calc R . .
C25 C 0.3115(3) 0.3184(3) 0.9377(2) 0.0657(8) Uani 1 1 d . . .
H25A H 0.2329 0.2770 0.9627 0.079 Uiso 1 1 calc R . .
C26 C 0.4616(3) 0.2914(2) 0.8880(2) 0.0550(7) Uani 1 1 d . . .
H26A H 0.4832 0.2315 0.8802 0.066 Uiso 1 1 calc R . .
C31 C 0.8685(3) 0.23269(18) 0.8816(2) 0.0423(6) Uani 1 1 d . . .
C32 C 0.9640(4) 0.1635(2) 0.8421(3) 0.0650(8) Uani 1 1 d . . .
H32A H 0.9770 0.1584 0.7624 0.078 Uiso 1 1 calc R . .
C33 C 1.0406(4) 0.1016(2) 0.9191(3) 0.0764(10) Uani 1 1 d . . .
H33A H 1.1008 0.0541 0.8905 0.092 Uiso 1 1 calc R . .
C34 C 1.0290(4) 0.1094(2) 1.0373(3) 0.0740(10) Uani 1 1 d . . .
H34A H 1.0817 0.0678 1.0890 0.089 Uiso 1 1 calc R . .
C35 C 0.9397(4) 0.1786(2) 1.0779(3) 0.0715(10) Uani 1 1 d . . .
H35A H 0.9323 0.1851 1.1581 0.086 Uiso 1 1 calc R . .
C36 C 0.8601(4) 0.2392(2) 1.0014(2) 0.0565(8) Uani 1 1 d . . .
H36A H 0.7987 0.2860 1.0309 0.068 Uiso 1 1 calc R . .

loop_
  _atom_site_aniso_label
  _atom_site_aniso_U_11
  _atom_site_aniso_U_22
  _atom_site_aniso_U_33
  _atom_site_aniso_U_23
  _atom_site_aniso_U_13
  _atom_site_aniso_U_12
P1 0.0399(3) 0.0465(4) 0.0347(3) 0.0024(4) 0.0024(2) -0.0030(4)
O1 0.0433(11) 0.0397(11) 0.0590(12) -0.0023(9) 0.0108(9) 0.0060(8)
O2 0.0773(14) 0.0555(13) 0.0429(11) 0.0124(10) -0.0131(9) -0.0196(11)
N1 0.0341(11) 0.0370(12) 0.0368(11) -0.0020(9) 0.0070(8) -0.0032(9)
C1 0.0273(11) 0.0375(15) 0.0332(12) 0.0008(11) 0.0045(9) 0.0020(11)
C2 0.0301(12) 0.0410(14) 0.0375(14) -0.0016(11) 0.0050(10) 0.0008(11)
C3 0.0380(13) 0.0446(16) 0.0419(14) 0.0019(14) 0.0038(10) -0.0022(13)
C4 0.0591(17) 0.0616(19) 0.0350(15) -0.0023(13) 0.0012(12) -0.0047(15)
C5 0.067(2) 0.066(2) 0.0446(18) -0.0162(16) 0.0010(14) -0.0135(17)
C6 0.0576(17) 0.0445(17) 0.0547(18) -0.0118(15) 0.0030(13) -0.0107(14)
C7 0.0363(14) 0.0368(15) 0.0444(16) -0.0032(12) 0.0037(11) -0.0021(11)
C8 0.0424(15) 0.0353(15) 0.0548(17) -0.0003(13) 0.0013(12) -0.0055(12)
C9 0.0450(15) 0.0417(16) 0.0436(15) 0.0118(12) 0.0044(12) -0.0037(12)
C10 0.0334(13) 0.0403(15) 0.0375(14) -0.0005(12) 0.0032(10) -0.0009(11)
C11 0.0386(14) 0.0370(15) 0.0285(12) -0.0004(11) 0.0018(10) 0.0031(12)
C12 0.106(3) 0.066(2) 0.060(2) 0.0209(18) -0.0081(19) -0.014(2)
C13 0.0404(14) 0.0490(19) 0.0651(18) -0.0093(14) 0.0155(13) -0.0010(12)
C14 0.080(2) 0.102(3) 0.077(2) -0.016(2) 0.0305(18) 0.011(2)
C15 0.0456(16) 0.092(2) 0.100(2) 0.009(3) 0.0041(15) 0.016(2)
C16 0.0428(15) 0.0494(17) 0.0490(16) -0.0013(13) 0.0057(12) -0.0140(13)
C17 0.077(2) 0.069(2) 0.065(2) -0.0193(17) 0.0005(16) -0.0196(18)
C18 0.082(2) 0.054(2) 0.071(2) 0.0124(17) 0.0077(17) -0.0180(17)
C21 0.0409(14) 0.0498(18) 0.0342(13) 0.0015(11) -0.0029(11) 0.0022(12)
C22 0.064(2) 0.062(2) 0.0574(19) 0.0058(15) 0.0086(15) 0.0085(16)
C23 0.082(3) 0.077(3) 0.080(2) -0.004(2) 0.016(2) 0.026(2)
C24 0.0502(19) 0.113(3) 0.060(2) 0.004(2) 0.0054(16) 0.027(2)
C25 0.0409(15) 0.096(3) 0.0593(18) 0.005(2) 0.0026(12) -0.0044(19)
C26 0.0453(16) 0.0607(19) 0.0587(18) -0.0006(14) 0.0027(13) -0.0014(14)
C31 0.0352(14) 0.0537(17) 0.0376(14) 0.0039(13) 0.0016(11) -0.0014(12)
C32 0.070(2) 0.078(2) 0.0464(17) 0.0005(16) 0.0003(15) 0.0179(18)
C33 0.077(2) 0.075(2) 0.075(3) 0.001(2) -0.0063(18) 0.0296(19)
C34 0.068(2) 0.081(3) 0.071(2) 0.0313(19) -0.0053(18) 0.0115(19)
C35 0.068(2) 0.101(3) 0.0447(18) 0.0217(18) 0.0052(15) 0.013(2)
C36 0.0546(18) 0.072(2) 0.0432(16) 0.0051(15) 0.0045(13) 0.0136(15)

_geom_special_details
;
  All esds (except the esd in the dihedral angle between two l.s. planes)
  are estimated using the full covariance matrix.  The cell esds are taken
  into account individually in the estimation of esds in distances, angles
  and torsion angles; correlations between esds in cell parameters are only
  used when they are defined by crystal symmetry.  An approximate (isotropic)
  treatment of cell esds is used for estimating esds involving l.s. planes.
;

loop_
  _geom_bond_atom_site_label_1
  _geom_bond_atom_site_label_2
  _geom_bond_distance
  _geom_bond_site_symmetry_2
  _geom_bond_publ_flag
P1 C31 1.832(3) . ?
P1 C21 1.835(2) . ?
P1 C10 1.844(2) . ?
O1 C11 1.227(3) . ?
O2 C3 1.366(3) . ?
O2 C12 1.402(3) . ?
N1 C11 1.345(3) . ?
N1 C13 1.474(3) . ?
N1 C16 1.478(3) . ?
C1 C10 1.377(3) . ?
C1 C2 1.434(3) . ?
C1 C11 1.514(3) . ?
C2 C7 1.419(3) . ?
C2 C3 1.424(3) . ?
C3 C4 1.365(3) . ?
C4 C5 1.388(4) . ?
C5 C6 1.351(4) . ?
C6 C7 1.414(3) . ?
C7 C8 1.409(3) . ?
C8 C9 1.348(3) . ?
C9 C10 1.428(3) . ?
C13 C14 1.513(4) . ?
C13 C15 1.520(4) . ?
C16 C17 1.514(4) . ?
C16 C18 1.520(4) . ?
C21 C22 1.380(4) . ?
C21 C26 1.387(3) . ?
C22 C23 1.383(4) . ?
C23 C24 1.368(5) . ?
C24 C25 1.366(5) . ?
C25 C26 1.380(4) . ?
C31 C32 1.377(4) . ?
C31 C36 1.383(3) . ?
C32 C33 1.381(4) . ?
C33 C34 1.371(4) . ?
C34 C35 1.356(5) . ?
C35 C36 1.372(4) . ?

loop_
  _geom_angle_atom_site_label_1
  _geom_angle_atom_site_label_2
  _geom_angle_atom_site_label_3
  _geom_angle
  _geom_angle_site_symmetry_1
  _geom_angle_site_symmetry_3
  _geom_angle_publ_flag
C31 P1 C21 101.12(11) . . ?
C31 P1 C10 103.43(12) . . ?
C21 P1 C10 101.70(11) . . ?
C3 O2 C12 118.8(2) . . ?
C11 N1 C13 122.7(2) . . ?
C11 N1 C16 120.1(2) . . ?
C13 N1 C16 117.21(19) . . ?
C10 C1 C2 120.7(2) . . ?
C10 C1 C11 117.29(19) . . ?
C2 C1 C11 121.9(2) . . ?
C7 C2 C3 116.9(2) . . ?
C7 C2 C1 118.6(2) . . ?
C3 C2 C1 124.5(2) . . ?
C4 C3 O2 122.8(2) . . ?
C4 C3 C2 121.2(3) . . ?
O2 C3 C2 115.9(2) . . ?
C3 C4 C5 120.4(3) . . ?
C6 C5 C4 121.0(3) . . ?
C5 C6 C7 120.1(3) . . ?
C8 C7 C6 120.8(2) . . ?
C8 C7 C2 119.0(2) . . ?
C6 C7 C2 120.2(2) . . ?
C9 C8 C7 121.7(2) . . ?
C8 C9 C10 120.7(2) . . ?
C1 C10 C9 119.2(2) . . ?
C1 C10 P1 118.01(18) . . ?
C9 C10 P1 122.82(19) . . ?
O1 C11 N1 123.6(2) . . ?
O1 C11 C1 118.5(2) . . ?
N1 C11 C1 117.9(2) . . ?
N1 C13 C14 111.8(2) . . ?
N1 C13 C15 111.6(2) . . ?
C14 C13 C15 112.2(2) . . ?
N1 C16 C17 112.9(2) . . ?
N1 C16 C18 111.7(2) . . ?
C17 C16 C18 112.4(2) . . ?
C22 C21 C26 117.7(2) . . ?
C22 C21 P1 117.5(2) . . ?
C26 C21 P1 124.7(2) . . ?
C21 C22 C23 121.1(3) . . ?
C24 C23 C22 119.9(3) . . ?
C25 C24 C23 120.3(3) . . ?
C24 C25 C26 119.7(3) . . ?
C25 C26 C21 121.3(3) . . ?
C32 C31 C36 117.1(2) . . ?
C32 C31 P1 122.23(19) . . ?
C36 C31 P1 120.0(2) . . ?
C31 C32 C33 120.8(3) . . ?
C34 C33 C32 120.8(3) . . ?
C35 C34 C33 119.1(3) . . ?
C34 C35 C36 120.3(3) . . ?
C35 C36 C31 121.9(3) . . ?

_diffrn_measured_fraction_theta_max    0.982
_diffrn_reflns_theta_full              27.54
_diffrn_measured_fraction_theta_full   0.982
_refine_diff_density_max    0.276
_refine_diff_density_min   -0.163
_refine_diff_density_rms    0.034

#===END

data_dai13a

_audit_creation_method            SHELXL-97
_chemical_name_systematic
;
  ?
;
_chemical_name_common             ?
_chemical_melting_point           ?
_chemical_formula_moiety          'C29 H30 N O2 P'
_chemical_formula_sum
  'C29 H30 N O2 P'
_chemical_formula_weight          455.51

loop_
  _atom_type_symbol
  _atom_type_description
  _atom_type_scat_dispersion_real
  _atom_type_scat_dispersion_imag
  _atom_type_scat_source
  'C'  'C'   0.0033   0.0016
  'International Tables Vol C Tables 4.2.6.8 and 6.1.1.4'
  'H'  'H'   0.0000   0.0000
  'International Tables Vol C Tables 4.2.6.8 and 6.1.1.4'
  'N'  'N'   0.0061   0.0033
  'International Tables Vol C Tables 4.2.6.8 and 6.1.1.4'
  'O'  'O'   0.0106   0.0060
  'International Tables Vol C Tables 4.2.6.8 and 6.1.1.4'
  'P'  'P'   0.1023   0.0942
  'International Tables Vol C Tables 4.2.6.8 and 6.1.1.4'

_symmetry_cell_setting            Monoclinic
_symmetry_space_group_name_H-M    P2(1)

loop_
  _symmetry_equiv_pos_as_xyz
  'x, y, z'
  '-x, y+1/2, -z'

_cell_length_a                    14.0092(8)
_cell_length_b                    11.9178(7)
_cell_length_c                    16.5822(10)
_cell_angle_alpha                 90.00
_cell_angle_beta                  114.9210(10)
_cell_angle_gamma                 90.00
_cell_volume                      2510.8(3)
_cell_formula_units_Z             4
_cell_measurement_temperature     293(2)
_cell_measurement_reflns_used     5954
_cell_measurement_theta_min       2.34
_cell_measurement_theta_max       27.32

_exptl_crystal_description        Block
_exptl_crystal_colour             Colourless
_exptl_crystal_size_max           0.5
_exptl_crystal_size_mid           0.35
_exptl_crystal_size_min           0.35
_exptl_crystal_density_meas       0
_exptl_crystal_density_diffrn     1.205
_exptl_crystal_density_method     'not measured'
_exptl_crystal_F_000              968
_exptl_absorpt_coefficient_mu     0.135
_exptl_absorpt_correction_type    Empirical
_exptl_absorpt_correction_T_min   ?
_exptl_absorpt_correction_T_max   ?
_exptl_absorpt_process_details    SADABS v2.03

_exptl_special_details
;
Ratio of minimum to maximum apparent transmission:  0.910812
;

_diffrn_ambient_temperature       293(2)
_diffrn_radiation_wavelength      0.71073
_diffrn_radiation_type            MoK\a
_diffrn_radiation_source          'fine-focus sealed tube'
_diffrn_radiation_monochromator   graphite
_diffrn_measurement_device_type   'CCD area detector'
_diffrn_measurement_method        'phi and omega scans'
_diffrn_detector_area_resol_mean  ?
_diffrn_standards_number          ?
_diffrn_standards_interval_count  ?
_diffrn_standards_interval_time   ?
_diffrn_standards_decay_%         ?
_diffrn_reflns_number             15250
_diffrn_reflns_av_R_equivalents   0.0200
_diffrn_reflns_av_sigmaI/netI     0.0328
_diffrn_reflns_limit_h_min        -18
_diffrn_reflns_limit_h_max        18
_diffrn_reflns_limit_k_min        -15
_diffrn_reflns_limit_k_max        9
_diffrn_reflns_limit_l_min        -21
_diffrn_reflns_limit_l_max        21
_diffrn_reflns_theta_min          1.60
_diffrn_reflns_theta_max          28.00
_reflns_number_total              7976
_reflns_number_gt                 7030
_reflns_threshold_expression      >2sigma(I)

_computing_data_collection        'Bruker SMART'
_computing_cell_refinement        'Bruker SMART'
_computing_data_reduction         'Bruker SAINT'
_computing_structure_solution     'SHELXS-97 (Sheldrick, 1990)'
_computing_structure_refinement   'SHELXL-97 (Sheldrick, 1997)'
_computing_molecular_graphics     'Bruker SHELXTL'
_computing_publication_material   'Bruker SHELXTL'

_refine_special_details
;
  Refinement of F^2^ against ALL reflections.  The weighted R-factor wR and
  goodness of fit S are based on F^2^, conventional R-factors R are based
  on F, with F set to zero for negative F^2^. The threshold expression of
  F^2^ > 2sigma(F^2^) is used only for calculating R-factors(gt) etc. and is
  not relevant to the choice of reflections for refinement.  R-factors based
  on F^2^ are statistically about twice as large as those based on F, and R-
  factors based on ALL data will be even larger.
;

_refine_ls_structure_factor_coef  Fsqd
_refine_ls_matrix_type            full
_refine_ls_weighting_scheme       calc
_refine_ls_weighting_details
  'calc w=1/[\s^2^(Fo^2^)+(0.0648P)^2^+0.0679P] where P=(Fo^2^+2Fc^2^)/3'
_atom_sites_solution_primary      direct
_atom_sites_solution_secondary    difmap
_atom_sites_solution_hydrogens    geom
_refine_ls_hydrogen_treatment     mixed
_refine_ls_extinction_method      none
_refine_ls_extinction_coef        ?
_refine_ls_abs_structure_details
  'Flack H D (1983), Acta Cryst. A39, 876-881'
_refine_ls_abs_structure_Flack    0.01(6)
_refine_ls_number_reflns          7976
_refine_ls_number_parameters      597
_refine_ls_number_restraints      1
_refine_ls_R_factor_all           0.0479
_refine_ls_R_factor_gt            0.0415
_refine_ls_wR_factor_ref          0.1057
_refine_ls_wR_factor_gt           0.1012
_refine_ls_goodness_of_fit_ref    1.025
_refine_ls_restrained_S_all       1.024
_refine_ls_shift/su_max           0.007
_refine_ls_shift/su_mean          0.001

loop_
  _atom_site_label
  _atom_site_type_symbol
  _atom_site_fract_x
  _atom_site_fract_y
  _atom_site_fract_z
  _atom_site_U_iso_or_equiv
  _atom_site_adp_type
  _atom_site_occupancy
  _atom_site_symmetry_multiplicity
  _atom_site_calc_flag
  _atom_site_refinement_flags
  _atom_site_disorder_assembly
  _atom_site_disorder_group
P1 P 0.55871(4) 0.50697(5) 0.24885(3) 0.04574(14) Uani 1 1 d . . .
O1 O 0.42209(11) 0.41959(14) 0.35396(10) 0.0485(4) Uani 1 1 d . . .
O2 O 0.34252(13) 0.17571(17) 0.32023(12) 0.0605(4) Uani 1 1 d . . .
H1 H 0.2979 0.1496 0.3348 0.076(10) Uiso 1 1 calc R . .
N1 N 0.55105(13) 0.28975(17) 0.39243(12) 0.0456(4) Uani 1 1 d . . .
C1A C 0.43359(15) 0.3203(2) 0.23494(14) 0.0422(5) Uani 1 1 d . . .
C2A C 0.47091(16) 0.3909(2) 0.18826(14) 0.0462(5) Uani 1 1 d . . .
C3A C 0.4340(2) 0.3775(3) 0.09490(16) 0.0608(6) Uani 1 1 d . . .
H3A H 0.4587 0.4254 0.0636 0.073 Uiso 1 1 calc R . .
C4A C 0.3645(2) 0.2974(3) 0.05090(16) 0.0672(8) Uani 1 1 d . . .
H4A H 0.3434 0.2894 -0.0100 0.081 Uiso 1 1 calc R . .
C5A C 0.32212(19) 0.2241(2) 0.09545(17) 0.0592(6) Uani 1 1 d . . .
C6A C 0.2445(2) 0.1444(3) 0.0486(2) 0.0776(9) Uani 1 1 d . . .
H6A H 0.2227 0.1359 -0.0123 0.093 Uiso 1 1 calc R . .
C7A C 0.2013(2) 0.0801(3) 0.0918(2) 0.0846(10) Uani 1 1 d . . .
H7A H 0.1492 0.0288 0.0595 0.102 Uiso 1 1 calc R . .
C8A C 0.23267(19) 0.0887(2) 0.1830(2) 0.0704(8) Uani 1 1 d . . .
H8A H 0.2017 0.0435 0.2110 0.084 Uiso 1 1 calc R . .
C9A C 0.31011(17) 0.1646(2) 0.23188(18) 0.0542(6) Uani 1 1 d . . .
C10A C 0.35691(16) 0.2351(2) 0.18908(15) 0.0475(5) Uani 1 1 d . . .
C11A C 0.46821(14) 0.34407(18) 0.33324(13) 0.0398(4) Uani 1 1 d . . .
C12A C 0.60074(18) 0.1944(2) 0.36751(17) 0.0572(6) Uani 1 1 d . . .
H12A H 0.5622 0.1837 0.3032 0.069 Uiso 1 1 calc R . .
C13A C 0.7134(2) 0.2209(4) 0.3859(2) 0.0831(10) Uani 1 1 d . . .
H13A H 0.7158 0.2896 0.3566 0.125 Uiso 1 1 calc R . .
H13B H 0.7418 0.1611 0.3640 0.125 Uiso 1 1 calc R . .
H13C H 0.7542 0.2289 0.4488 0.125 Uiso 1 1 calc R . .
C14A C 0.5915(3) 0.0861(3) 0.4119(3) 0.0912(10) Uani 1 1 d . . .
H14A H 0.5189 0.0721 0.3984 0.137 Uiso 1 1 calc R . .
H14B H 0.6309 0.0926 0.4751 0.137 Uiso 1 1 calc R . .
H14C H 0.6189 0.0251 0.3902 0.137 Uiso 1 1 calc R . .
C15A C 0.59352(19) 0.3203(3) 0.48801(16) 0.0604(6) Uani 1 1 d . . .
H15A H 0.6543 0.2714 0.5192 0.072 Uiso 1 1 calc R . .
C16A C 0.6340(3) 0.4391(3) 0.50499(19) 0.0819(9) Uani 1 1 d . . .
H16A H 0.6839 0.4501 0.4799 0.123 Uiso 1 1 calc R . .
H16B H 0.6677 0.4525 0.5679 0.123 Uiso 1 1 calc R . .
H16C H 0.5764 0.4903 0.4779 0.123 Uiso 1 1 calc R . .
C17A C 0.5149(3) 0.2956(4) 0.5269(2) 0.0887(11) Uani 1 1 d . . .
H17A H 0.4918 0.2191 0.5146 0.133 Uiso 1 1 calc R . .
H17B H 0.4554 0.3448 0.5005 0.133 Uiso 1 1 calc R . .
H17C H 0.5478 0.3074 0.5900 0.133 Uiso 1 1 calc R . .
C21A C 0.47637(18) 0.6271(2) 0.19025(16) 0.0515(5) Uani 1 1 d . . .
C22A C 0.4646(2) 0.6662(3) 0.10800(18) 0.0693(7) Uani 1 1 d . . .
H22A H 0.5008 0.6315 0.0791 0.083 Uiso 1 1 calc R . .
C23A C 0.3989(3) 0.7570(3) 0.0680(2) 0.0836(10) Uani 1 1 d . . .
H23A H 0.3916 0.7830 0.0129 0.100 Uiso 1 1 calc R . .
C24A C 0.3454(3) 0.8074(3) 0.1103(3) 0.0931(12) Uani 1 1 d . . .
H24A H 0.3008 0.8674 0.0835 0.112 Uiso 1 1 calc R . .
C25A C 0.3566(3) 0.7708(4) 0.1907(4) 0.1035(13) Uani 1 1 d . . .
H25A H 0.3205 0.8067 0.2192 0.124 Uiso 1 1 calc R . .
C26A C 0.4211(3) 0.6803(3) 0.2317(2) 0.0791(9) Uani 1 1 d . . .
H26A H 0.4273 0.6554 0.2868 0.095 Uiso 1 1 calc R . .
C31A C 0.66070(16) 0.5109(2) 0.20658(13) 0.0443(4) Uani 1 1 d . . .
C32A C 0.72412(19) 0.6052(2) 0.22710(16) 0.0555(6) Uani 1 1 d . . .
H32A H 0.7069 0.6665 0.2530 0.067 Uiso 1 1 calc R . .
C33A C 0.8126(2) 0.6105(3) 0.21000(17) 0.0620(6) Uani 1 1 d . . .
H33A H 0.8540 0.6748 0.2245 0.074 Uiso 1 1 calc R . .
C34A C 0.83925(19) 0.5208(2) 0.17163(17) 0.0600(6) Uani 1 1 d . . .
H34A H 0.8985 0.5241 0.1599 0.072 Uiso 1 1 calc R . .
C35A C 0.7776(2) 0.4266(3) 0.15085(18) 0.0654(7) Uani 1 1 d . . .
H35A H 0.7953 0.3657 0.1248 0.078 Uiso 1 1 calc R . .
C36A C 0.6889(2) 0.4209(2) 0.16813(17) 0.0596(6) Uani 1 1 d . . .
H36A H 0.6481 0.3561 0.1538 0.072 Uiso 1 1 calc R . .
P2 P -0.06013(4) 0.05760(5) 0.28022(4) 0.04702(14) Uani 1 1 d . . .
O3 O 0.18361(11) 0.14405(14) 0.37016(10) 0.0484(4) Uani 1 1 d . . .
O4 O 0.22216(12) 0.38800(15) 0.32167(10) 0.0505(4) Uani 1 1 d . . .
H2 H 0.2840 0.3767 0.3322 0.087(11) Uiso 1 1 calc R . .
N2 N 0.09757(13) 0.28309(17) 0.40606(11) 0.0432(4) Uani 1 1 d . . .
C1B C 0.04981(15) 0.23503(18) 0.24901(12) 0.0375(4) Uani 1 1 d . . .
C2B C -0.03199(16) 0.15961(19) 0.20925(13) 0.0420(4) Uani 1 1 d . . .
C3B C -0.09005(18) 0.1617(2) 0.11527(14) 0.0525(5) Uani 1 1 d . . .
H3B H -0.1445 0.1107 0.0880 0.063 Uiso 1 1 calc R . .
C4B C -0.06672(19) 0.2377(2) 0.06475(14) 0.0553(6) Uani 1 1 d . . .
H4B H -0.1065 0.2382 0.0035 0.066 Uiso 1 1 calc R . .
C5B C 0.01559(18) 0.3150(2) 0.10271(14) 0.0475(5) Uani 1 1 d . . .
C6B C 0.0407(2) 0.3913(3) 0.04955(16) 0.0625(7) Uani 1 1 d . . .
H6B H -0.0003 0.3936 -0.0115 0.075 Uiso 1 1 calc R . .
C7B C 0.1249(2) 0.4619(3) 0.08709(18) 0.0678(7) Uani 1 1 d . . .
H7B H 0.1411 0.5112 0.0512 0.081 Uiso 1 1 calc R . .
C8B C 0.1867(2) 0.4609(2) 0.17810(17) 0.0578(6) Uani 1 1 d . . .
H8B H 0.2441 0.5090 0.2025 0.069 Uiso 1 1 calc R . .
C9B C 0.16362(16) 0.38926(19) 0.23253(14) 0.0435(5) Uani 1 1 d . . .
C10B C 0.07658(16) 0.31378(18) 0.19680(13) 0.0397(4) Uani 1 1 d . . .
C11B C 0.11777(15) 0.22061(18) 0.34827(13) 0.0383(4) Uani 1 1 d . . .
C12B C 0.02514(18) 0.3795(2) 0.37786(16) 0.0531(6) Uani 1 1 d . . .
H12B H 0.0004 0.3866 0.3133 0.064 Uiso 1 1 calc R . .
C13B C -0.0708(2) 0.3585(3) 0.3957(2) 0.0811(9) Uani 1 1 d . . .
H13D H -0.1027 0.2886 0.3691 0.122 Uiso 1 1 calc R . .
H13E H -0.1204 0.4184 0.3706 0.122 Uiso 1 1 calc R . .
H13F H -0.0501 0.3553 0.4587 0.122 Uiso 1 1 calc R . .
C14B C 0.0792(3) 0.4883(3) 0.4184(2) 0.0794(9) Uani 1 1 d . . .
H14D H 0.1394 0.4985 0.4056 0.119 Uiso 1 1 calc R . .
H14E H 0.1015 0.4859 0.4817 0.119 Uiso 1 1 calc R . .
H14F H 0.0311 0.5495 0.3938 0.119 Uiso 1 1 calc R . .
C15B C 0.1525(2) 0.2591(3) 0.50284(14) 0.0601(7) Uani 1 1 d . . .
H15B H 0.1260 0.3131 0.5330 0.072 Uiso 1 1 calc R . .
C16B C 0.1258(3) 0.1426(3) 0.52508(18) 0.0876(11) Uani 1 1 d . . .
H16D H 0.0507 0.1343 0.5014 0.131 Uiso 1 1 calc R . .
H16E H 0.1556 0.1332 0.5885 0.131 Uiso 1 1 calc R . .
H16F H 0.1541 0.0869 0.4994 0.131 Uiso 1 1 calc R . .
C17B C 0.2711(2) 0.2770(3) 0.53923(17) 0.0754(9) Uani 1 1 d . . .
H17D H 0.2851 0.3514 0.5247 0.113 Uiso 1 1 calc R . .
H17E H 0.3007 0.2231 0.5132 0.113 Uiso 1 1 calc R . .
H17F H 0.3022 0.2678 0.6026 0.113 Uiso 1 1 calc R . .
C21B C -0.20350(17) 0.0353(2) 0.22164(15) 0.0496(5) Uani 1 1 d . . .
C22B C -0.2454(2) -0.0661(3) 0.2321(3) 0.0875(10) Uani 1 1 d . . .
H22B H -0.2007 -0.1252 0.2610 0.105 Uiso 1 1 calc R . .
C23B C -0.3538(3) -0.0801(3) 0.1997(3) 0.1154(16) Uani 1 1 d . . .
H23B H -0.3810 -0.1487 0.2068 0.138 Uiso 1 1 calc R . .
C24B C -0.4204(2) 0.0058(3) 0.1577(2) 0.0856(9) Uani 1 1 d . . .
H24B H -0.4928 -0.0046 0.1353 0.103 Uiso 1 1 calc R . .
C25B C -0.3806(2) 0.1067(3) 0.1485(2) 0.0736(8) Uani 1 1 d . . .
H25B H -0.4255 0.1661 0.1206 0.088 Uiso 1 1 calc R . .
C26B C -0.2722(2) 0.1199(3) 0.1814(2) 0.0682(7) Uani 1 1 d . . .
H26B H -0.2456 0.1895 0.1757 0.082 Uiso 1 1 calc R . .
C31B C -0.00734(18) -0.0730(2) 0.25602(16) 0.0543(6) Uani 1 1 d . . .
C32B C -0.0449(3) -0.1269(3) 0.1741(2) 0.0759(8) Uani 1 1 d . . .
H32B H -0.1018 -0.0963 0.1263 0.091 Uiso 1 1 calc R . .
C33B C -0.0002(3) -0.2244(3) 0.1618(3) 0.0913(11) Uani 1 1 d . . .
H33B H -0.0249 -0.2580 0.1060 0.110 Uiso 1 1 calc R . .
C34B C 0.0821(3) -0.2718(4) 0.2336(4) 0.1150(16) Uani 1 1 d . . .
H34B H 0.1136 -0.3375 0.2265 0.138 Uiso 1 1 calc R . .
C35B C 0.1162(4) -0.2227(4) 0.3129(4) 0.157(3) Uani 1 1 d . . .
H35B H 0.1699 -0.2563 0.3615 0.188 Uiso 1 1 calc R . .
C36B C 0.0740(3) -0.1239(3) 0.3246(3) 0.1162(17) Uani 1 1 d . . .
H36B H 0.1012 -0.0906 0.3805 0.139 Uiso 1 1 calc R . .

loop_
  _atom_site_aniso_label
  _atom_site_aniso_U_11
  _atom_site_aniso_U_22
  _atom_site_aniso_U_33
  _atom_site_aniso_U_23
  _atom_site_aniso_U_13
  _atom_site_aniso_U_12
P1 0.0501(3) 0.0445(3) 0.0438(3) -0.0023(2) 0.0209(2) -0.0066(3)
O1 0.0419(7) 0.0453(9) 0.0584(8) -0.0077(7) 0.0213(6) -0.0030(7)
O2 0.0492(8) 0.0564(11) 0.0834(11) -0.0073(9) 0.0352(8) -0.0128(8)
N1 0.0377(8) 0.0494(11) 0.0492(9) 0.0027(8) 0.0178(7) -0.0020(8)
C1A 0.0317(9) 0.0397(12) 0.0514(11) -0.0042(9) 0.0138(8) 0.0014(8)
C2A 0.0443(11) 0.0431(12) 0.0483(11) -0.0019(9) 0.0166(9) -0.0023(9)
C3A 0.0699(15) 0.0613(16) 0.0473(12) -0.0008(12) 0.0210(11) -0.0030(13)
C4A 0.0711(16) 0.073(2) 0.0454(12) -0.0099(13) 0.0133(11) 0.0011(15)
C5A 0.0479(12) 0.0525(15) 0.0624(14) -0.0158(12) 0.0090(10) 0.0022(11)
C6A 0.0656(17) 0.071(2) 0.0775(17) -0.0310(16) 0.0115(14) -0.0076(15)
C7A 0.0594(15) 0.064(2) 0.112(2) -0.0392(19) 0.0178(16) -0.0147(15)
C8A 0.0479(13) 0.0478(16) 0.113(2) -0.0226(15) 0.0315(14) -0.0102(11)
C9A 0.0393(11) 0.0386(12) 0.0840(16) -0.0128(12) 0.0253(11) -0.0001(10)
C10A 0.0362(10) 0.0381(12) 0.0616(13) -0.0123(10) 0.0141(9) 0.0009(9)
C11A 0.0311(9) 0.0380(11) 0.0512(11) -0.0033(9) 0.0184(8) -0.0082(8)
C12A 0.0457(12) 0.0615(16) 0.0621(13) 0.0063(12) 0.0205(10) 0.0146(12)
C13A 0.0496(14) 0.108(3) 0.096(2) 0.011(2) 0.0347(14) 0.0147(17)
C14A 0.087(2) 0.062(2) 0.129(3) 0.0203(19) 0.049(2) 0.0210(17)
C15A 0.0513(12) 0.0765(19) 0.0477(12) 0.0021(12) 0.0154(10) -0.0030(13)
C16A 0.0766(18) 0.090(2) 0.0631(16) -0.0194(16) 0.0134(13) -0.0252(17)
C17A 0.100(2) 0.113(3) 0.0667(17) 0.0091(18) 0.0483(17) -0.007(2)
C21A 0.0481(12) 0.0458(13) 0.0583(13) -0.0071(10) 0.0201(10) -0.0046(10)
C22A 0.0689(16) 0.0662(19) 0.0646(15) 0.0016(14) 0.0202(12) 0.0159(15)
C23A 0.081(2) 0.067(2) 0.0772(19) 0.0103(16) 0.0077(15) 0.0178(17)
C24A 0.0598(17) 0.060(2) 0.136(3) -0.002(2) 0.0189(19) 0.0144(16)
C25A 0.101(3) 0.077(3) 0.155(4) -0.007(3) 0.076(3) 0.026(2)
C26A 0.091(2) 0.0624(19) 0.102(2) -0.0089(17) 0.0585(18) 0.0061(17)
C31A 0.0477(10) 0.0419(11) 0.0428(10) 0.0064(9) 0.0186(8) 0.0041(10)
C32A 0.0564(13) 0.0490(14) 0.0634(14) -0.0032(11) 0.0275(11) -0.0014(11)
C33A 0.0578(14) 0.0560(16) 0.0744(16) 0.0016(13) 0.0300(12) -0.0110(13)
C34A 0.0567(13) 0.0614(17) 0.0690(14) 0.0151(13) 0.0334(11) 0.0066(13)
C35A 0.0737(16) 0.0539(16) 0.0804(17) -0.0037(14) 0.0440(14) 0.0062(14)
C36A 0.0666(15) 0.0414(13) 0.0779(16) -0.0051(12) 0.0374(13) -0.0047(12)
P2 0.0498(3) 0.0449(3) 0.0481(3) -0.0037(2) 0.0224(2) -0.0082(3)
O3 0.0446(8) 0.0467(9) 0.0541(8) 0.0115(7) 0.0211(6) 0.0061(7)
O4 0.0415(8) 0.0562(10) 0.0566(8) 0.0078(8) 0.0234(6) -0.0027(7)
N2 0.0403(9) 0.0514(11) 0.0403(8) -0.0012(8) 0.0193(7) -0.0057(8)
C1B 0.0389(9) 0.0354(10) 0.0421(10) 0.0006(8) 0.0208(8) 0.0054(8)
C2B 0.0442(10) 0.0428(12) 0.0412(10) -0.0016(9) 0.0201(8) 0.0016(9)
C3B 0.0538(12) 0.0549(15) 0.0454(11) -0.0107(11) 0.0175(9) -0.0024(11)
C4B 0.0605(13) 0.0646(16) 0.0380(10) -0.0001(11) 0.0179(9) 0.0125(12)
C5B 0.0530(12) 0.0507(13) 0.0432(10) 0.0062(10) 0.0245(9) 0.0166(11)
C6B 0.0770(16) 0.0655(18) 0.0517(12) 0.0221(12) 0.0335(12) 0.0235(15)
C7B 0.0878(19) 0.0576(16) 0.0741(17) 0.0287(14) 0.0497(15) 0.0148(15)
C8B 0.0621(14) 0.0454(13) 0.0757(15) 0.0181(12) 0.0386(12) 0.0077(11)
C9B 0.0441(10) 0.0383(11) 0.0550(12) 0.0073(9) 0.0276(9) 0.0096(9)
C10B 0.0423(10) 0.0382(11) 0.0442(10) 0.0070(8) 0.0236(8) 0.0130(9)
C11B 0.0348(9) 0.0397(11) 0.0423(10) 0.0034(8) 0.0182(8) -0.0040(8)
C12B 0.0510(12) 0.0573(15) 0.0562(12) -0.0099(11) 0.0275(10) 0.0023(11)
C13B 0.0621(15) 0.091(2) 0.106(2) -0.0244(19) 0.0510(16) -0.0058(17)
C14B 0.0831(19) 0.0580(19) 0.110(2) -0.0201(17) 0.0537(18) -0.0061(15)
C15B 0.0599(14) 0.0793(19) 0.0395(11) -0.0044(11) 0.0195(10) -0.0180(13)
C16B 0.097(2) 0.108(3) 0.0527(14) 0.0213(16) 0.0266(14) -0.033(2)
C17B 0.0610(15) 0.096(2) 0.0521(13) 0.0010(15) 0.0074(11) -0.0242(16)
C21B 0.0498(11) 0.0437(13) 0.0605(12) -0.0095(10) 0.0283(10) -0.0077(10)
C22B 0.0581(16) 0.0497(17) 0.152(3) 0.0149(19) 0.0410(18) -0.0029(14)
C23B 0.0678(19) 0.056(2) 0.216(5) 0.018(3) 0.053(2) -0.0151(17)
C24B 0.0493(14) 0.067(2) 0.133(3) -0.008(2) 0.0307(16) -0.0091(15)
C25B 0.0557(15) 0.0596(17) 0.100(2) 0.0038(16) 0.0277(14) 0.0003(14)
C26B 0.0582(14) 0.0514(16) 0.0993(19) 0.0062(14) 0.0373(14) -0.0036(13)
C31B 0.0486(12) 0.0430(13) 0.0728(15) 0.0042(12) 0.0270(11) -0.0022(11)
C32B 0.106(2) 0.0621(19) 0.0732(17) 0.0073(15) 0.0515(16) 0.0151(17)
C33B 0.132(3) 0.0593(19) 0.121(3) -0.0066(19) 0.091(3) -0.004(2)
C34B 0.070(2) 0.058(2) 0.211(5) -0.005(3) 0.053(3) 0.0115(19)
C35B 0.094(3) 0.069(3) 0.204(5) -0.025(3) -0.038(3) 0.026(2)
C36B 0.095(3) 0.064(2) 0.120(3) -0.016(2) -0.023(2) 0.014(2)

_geom_special_details
;
  All esds (except the esd in the dihedral angle between two l.s. planes)
  are estimated using the full covariance matrix.  The cell esds are taken
  into account individually in the estimation of esds in distances, angles
  and torsion angles; correlations between esds in cell parameters are only
  used when they are defined by crystal symmetry.  An approximate (isotropic)
  treatment of cell esds is used for estimating esds involving l.s. planes.
;

loop_
  _geom_bond_atom_site_label_1
  _geom_bond_atom_site_label_2
  _geom_bond_distance
  _geom_bond_site_symmetry_2
  _geom_bond_publ_flag
P1 C31A 1.838(2) . ?
P1 C21A 1.839(3) . ?
P1 C2A 1.842(2) . ?
O1 C11A 1.238(3) . ?
O2 C9A 1.345(3) . ?
N1 C11A 1.330(3) . ?
N1 C12A 1.480(3) . ?
N1 C15A 1.485(3) . ?
C1A C2A 1.386(3) . ?
C1A C10A 1.440(3) . ?
C1A C11A 1.519(3) . ?
C2A C3A 1.420(3) . ?
C3A C4A 1.340(4) . ?
C4A C5A 1.425(4) . ?
C5A C6A 1.405(4) . ?
C5A C10A 1.424(3) . ?
C6A C7A 1.353(5) . ?
C7A C8A 1.389(5) . ?
C8A C9A 1.382(3) . ?
C9A C10A 1.426(4) . ?
C12A C13A 1.510(4) . ?
C12A C14A 1.518(5) . ?
C15A C16A 1.507(5) . ?
C15A C17A 1.521(4) . ?
C21A C22A 1.383(4) . ?
C21A C26A 1.386(4) . ?
C22A C23A 1.394(4) . ?
C23A C24A 1.364(5) . ?
C24A C25A 1.347(6) . ?
C25A C26A 1.387(6) . ?
C31A C32A 1.383(3) . ?
C31A C36A 1.388(3) . ?
C32A C33A 1.384(4) . ?
C33A C34A 1.373(4) . ?
C34A C35A 1.369(4) . ?
C35A C36A 1.390(4) . ?
P2 C31B 1.839(3) . ?
P2 C21B 1.845(2) . ?
P2 C2B 1.846(2) . ?
O3 C11B 1.238(3) . ?
O4 C9B 1.355(3) . ?
N2 C11B 1.335(3) . ?
N2 C12B 1.473(3) . ?
N2 C15B 1.486(3) . ?
C1B C2B 1.385(3) . ?
C1B C10B 1.430(3) . ?
C1B C11B 1.525(3) . ?
C2B C3B 1.422(3) . ?
C3B C4B 1.364(4) . ?
C4B C5B 1.401(4) . ?
C5B C6B 1.410(3) . ?
C5B C10B 1.429(3) . ?
C6B C7B 1.367(4) . ?
C7B C8B 1.388(4) . ?
C8B C9B 1.376(3) . ?
C9B C10B 1.428(3) . ?
C12B C14B 1.509(4) . ?
C12B C13B 1.514(4) . ?
C15B C16B 1.523(5) . ?
C15B C17B 1.525(4) . ?
C21B C26B 1.359(4) . ?
C21B C22B 1.386(4) . ?
C22B C23B 1.391(5) . ?
C23B C24B 1.362(5) . ?
C24B C25B 1.361(5) . ?
C25B C26B 1.390(4) . ?
C31B C36B 1.366(4) . ?
C31B C32B 1.390(4) . ?
C32B C33B 1.376(5) . ?
C33B C34B 1.381(6) . ?
C34B C35B 1.331(7) . ?
C35B C36B 1.368(6) . ?

loop_
  _geom_angle_atom_site_label_1
  _geom_angle_atom_site_label_2
  _geom_angle_atom_site_label_3
  _geom_angle
  _geom_angle_site_symmetry_1
  _geom_angle_site_symmetry_3
  _geom_angle_publ_flag
C31A P1 C21A 101.19(10) . . ?
C31A P1 C2A 105.00(10) . . ?
C21A P1 C2A 99.81(10) . . ?
C11A N1 C12A 122.32(18) . . ?
C11A N1 C15A 120.1(2) . . ?
C12A N1 C15A 117.55(19) . . ?
C2A C1A C10A 120.40(19) . . ?
C2A C1A C11A 117.46(18) . . ?
C10A C1A C11A 121.86(19) . . ?
C1A C2A C3A 119.4(2) . . ?
C1A C2A P1 118.26(16) . . ?
C3A C2A P1 122.15(19) . . ?
C4A C3A C2A 121.4(3) . . ?
C3A C4A C5A 121.4(2) . . ?
C6A C5A C10A 119.7(3) . . ?
C6A C5A C4A 121.4(3) . . ?
C10A C5A C4A 118.9(2) . . ?
C7A C6A C5A 120.3(3) . . ? 
C6A C7A C8A 121.8(3) . . ?
C9A C8A C7A 119.8(3) . . ?
O2 C9A C8A 121.6(3) . . ?
O2 C9A C10A 118.0(2) . . ?
C8A C9A C10A 120.4(3) . . ?
C5A C10A C9A 118.1(2) . . ?
C5A C10A C1A 118.5(2) . . ?
C9A C10A C1A 123.4(2) . . ?
O1 C11A N1 122.97(19) . . ?
O1 C11A C1A 117.75(18) . . ?
N1 C11A C1A 119.07(19) . . ?
N1 C12A C13A 111.0(3) . . ?
N1 C12A C14A 111.8(2) . . ?
C13A C12A C14A 112.1(2) . . ?
N1 C15A C16A 112.3(2) . . ?
N1 C15A C17A 111.6(2) . . ?
C16A C15A C17A 112.7(3) . . ?
C22A C21A C26A 118.3(3) . . ?
C22A C21A P1 124.8(2) . . ?
C26A C21A P1 116.8(2) . . ?
C21A C22A C23A 120.7(3) . . ?
C24A C23A C22A 119.6(3) . . ?
C25A C24A C23A 120.4(3) . . ?
C24A C25A C26A 121.1(3) . . ?
C21A C26A C25A 119.9(3) . . ?
C32A C31A C36A 117.6(2) . . ?
C32A C31A P1 116.67(17) . . ?
C36A C31A P1 124.96(18) . . ?
C31A C32A C33A 121.6(2) . . ?
C34A C33A C32A 120.1(3) . . ?
C35A C34A C33A 119.2(2) . . ?
C34A C35A C36A 120.8(3) . . ?
C31A C36A C35A 120.6(2) . . ?
C31B P2 C21B 102.23(11) . . ?
C31B P2 C2B 101.82(10) . . ?
C21B P2 C2B 103.70(10) . . ?
C11B N2 C12B 122.24(17) . . ?
C11B N2 C15B 119.9(2) . . ?
C12B N2 C15B 117.84(19) . . ?
C2B C1B C10B 120.87(18) . . ?
C2B C1B C11B 117.11(18) . . ?
C10B C1B C11B 121.59(18) . . ?
C1B C2B C3B 119.1(2) . . ?
C1B C2B P2 118.68(14) . . ?
C3B C2B P2 122.20(17) . . ?
C4B C3B C2B 120.7(2) . . ?
C3B C4B C5B 121.7(2) . . ?
C4B C5B C6B 121.2(2) . . ?
C4B C5B C10B 118.9(2) . . ?
C6B C5B C10B 119.8(2) . . ?
C7B C6B C5B 120.5(2) . . ?
C6B C7B C8B 120.9(2) . . ?
C9B C8B C7B 120.5(3) . . ?
O4 C9B C8B 121.4(2) . . ?
O4 C9B C10B 117.65(18) . . ?
C8B C9B C10B 121.0(2) . . ?
C9B C10B C5B 117.37(19) . . ?
C9B C10B C1B 123.94(18) . . ?
C5B C10B C1B 118.6(2) . . ?
O3 C11B N2 123.91(18) . . ?
O3 C11B C1B 116.66(18) . . ?
N2 C11B C1B 119.17(18) . . ?
N2 C12B C14B 112.3(2) . . ?
N2 C12B C13B 111.0(2) . . ?
C14B C12B C13B 112.0(2) . . ?
N2 C15B C16B 111.6(2) . . ?
N2 C15B C17B 112.49(19) . . ?
C16B C15B C17B 111.7(3) . . ?
C26B C21B C22B 117.3(2) . . ?
C26B C21B P2 122.68(19) . . ?
C22B C21B P2 119.0(2) . . ?
C21B C22B C23B 120.5(3) . . ?
C24B C23B C22B 120.5(3) . . ?
C25B C24B C23B 119.9(3) . . ?
C24B C25B C26B 119.1(3) . . ?
C21B C26B C25B 122.6(3) . . ?
C36B C31B C32B 116.6(3) . . ?
C36B C31B P2 117.7(2) . . ?
C32B C31B P2 125.7(2) . . ?
C33B C32B C31B 121.8(3) . . ?
C32B C33B C34B 119.0(4) . . ?
C35B C34B C33B 119.6(4) . . ?
C34B C35B C36B 121.5(4) . . ?
C31B C36B C35B 121.5(4) . . ?

loop_
  _geom_hbond_atom_site_label_D
  _geom_hbond_atom_site_label_H
  _geom_hbond_atom_site_label_A
  _geom_hbond_distance_DH
  _geom_hbond_distance_HA
  _geom_hbond_distance_DA
  _geom_hbond_angle_DHA
  _geom_hbond_site_symmetry_A
O2 H1 O3  0.82 1.92 2.709(2) 159.6 .
O4 H2 O1  0.82 1.88 2.648(2) 154.8 .

_diffrn_measured_fraction_theta_max    0.962
_diffrn_reflns_theta_full              28.00
_diffrn_measured_fraction_theta_full   0.962
_refine_diff_density_max    0.245
_refine_diff_density_min   -0.145
_refine_diff_density_rms    0.038

#===END
